# Supplementary material for: Proactive Interference Unmasks Sex-Divergent Recognition Memory Instability and Catecholaminergic Dysfunction in Early-Stage Alzheimer’s model
Source: Research Square preprint supplement (doi:10.21203/rs.3.rs-7591768/v1), 2025-09-12
Supplement: Supplementary file 1 [file 27b1b0fdb648afada1f4addf.docx]

| Supplementary Table 1: Details of statistical analysis   | **Figure No.** | **No. of animals per sex/genotype (n)** | **Degrees of freedom and P-value** | | --- | --- | --- | | 1B (Male, PI) | WT male = 10; APP/PS1 male = 10 | NOR, PI+NOR: F(1,36)=11.10, *p=*0.0020; Genotype: F(1,36)=7.500, *p=*0.0095; Interaction: F(1,36)=6.326, *p=*0.0165 | | 1B (Female, PI) | WT female = 10; APP/PS1 female = 10 | NOR, PI+NOR: F(1,36)=1.276, *p=*0.2661; Genotype: F(1,36)=0.09437, *p=*0.7605; Interaction: F(1,36)=0.02201, *p=*0.8829 | | 1C (Male, NOR) | WT male = 10; APP/PS1 male = 10 | Object exploration (s): F(1,36)=16.34, *p=*0.0003; Genotype: F(1,36)=0.06606, *p=*0.7986; Interaction: F(1,36)=0.009477, *p=*0.9230 | | 1C (Female, NOR) | WT female = 10; APP/PS1 female = 10 | Object exploration (s): F(1,36)=33.89, *p<*0.0001; Genotype: F(1,36)=2.889, *p=*0.0978; Interaction: F(1,36)=0.6437, *p=*0.4276 | | 1D (Male, PI+NOR) | WT male = 10; APP/PS1 male = 10 | Object exploration (s): F(1,36)=30.17, *p<*0.0001; Genotype: F(1,36)=12.14, *p=*0.0013; Interaction: F(1,36)=10.90, *p=*0.0022 | | 1D (Female, PI+NOR) | WT female = 10; APP/PS1 female = 10 | Object exploration (s): F(1,36)=24.58, *p<*0.0001; Genotype: F(1,36)=4.612, *p=*0.0386; Interaction: F(1,36)=0.01880, *p=*0.8917 | | 2A (dH) | WT male=5; APP/PS1 male=5; WT female=5; APP/PS1 female=5 | Sex: F(1,16)=10.12, *p=*0.0058; Genotype: F(1,16)=23.42, *p=*0.0002; Interaction: F(1,16)=4.683, *p=*0.0459 | | 2A (dDG) | WT male=5; APP/PS1 male=5; WT female=5; APP/PS1 female=5 | Sex: F(1,16)=10.98, *p=*0.0044; Genotype: F(1,16)=15.00, *p=*0.0014; Interaction: F(1,16)=4.487, *p=*0.0502 | | 2A (dPoDG) | WT male=4; APP/PS1 male=4; WT female=4; APP/PS1 female=4 | Sex: F(1,12)=3.408, *p=*0.0897; Genotype: F(1,12)=11.57, *p=*0.0053; Interaction: F(1,12)=2.864, *p=*0.1163 | | 2A (dMoDG) | WT male=5; APP/PS1 male=5; WT female=5; APP/PS1 female=5 | Sex: F(1,16)=10.96, *p=*0.0044; Genotype: F(1,16)=12.32, *p=*0.0029; Interaction: F(1,16)=2.804, *p=*0.1135 | | 2B (dCA3) | WT male=5; APP/PS1 male=5; WT female=5; APP/PS1 female=5 | Sex: F(1,16)=7.002, *p=*0.0176; Genotype: F(1,16)=20.82, *p=*0.0003; Interaction: F(1,16)=5.662, *p=*0.0301 | | 2B (dCA3 SR) | WT male=5; APP/PS1 male=5; WT female=5; APP/PS1 female=5 | Sex: F(1,16)=6.581, *p=*0.0207; Genotype: F(1,16)=16.70, *p=*0.0009; Interaction: F(1,16)=5.073, *p=*0.0387 | | 2B (dCA3 SO) | WT male=5; APP/PS1 male=5; WT female=5; APP/PS1 female=5 | Sex: F(1,16)=3.146, *p=*0.0952; Genotype: F(1,16)=14.01, *p=*0.0018; Interaction: F(1,16)=1.624, *p=*0.2208 | | 2B (dCA3 SL) | WT male=5; APP/PS1 male=5; WT female=5; APP/PS1 female=5 | Sex: F(1,16)=5.496, *p=*0.0323; Genotype: F(1,16)=14.44, *p=*0.0016; Interaction: F(1,16)=5.714, *p=*0.0295 | | 2C (dCA1) | WT male=5; APP/PS1 male=5; WT female=5; APP/PS1 female=5 | Sex: F(1,16)=8.004, *p=*0.0121; Genotype: F(1,16)=22.04, *p=*0.0002; Interaction: F(1,16)=2.070, *p=*0.1695 | | 2C (dCA1 SR) | WT male=5; APP/PS1 male=5; WT female=5; APP/PS1 female=5 | Sex: F(1,16)=8.946, *p=*0.0086; Genotype: F(1,16)=16.76, *p=*0.0008; Interaction: F(1,16)=1.005, *p=*0.3309 | | 2C (dCA1 SO) | WT male=5; APP/PS1 male=5; WT female=5; APP/PS1 female=5 | Sex: F(1,16)=5.178, *p=*0.0370; Genotype: F(1,16)=19.69, *p=*0.0004; Interaction: F(1,16)=0.2379, *p=*0.6323 | | 2C (dCA1 SLM) | WT male=5; APP/PS1 male=5; WT female=5; APP/PS1 female=5 | Sex: F(1,16)=5.437, *p=*0.0331; Genotype: F(1,16)=17.24, *p=*0.0008; Interaction: F(1,16)=4.239, *p=*0.0562 | | 2F (Silver staining, dH) | WT male=3; APP/PS1 male=3; WT female=3; APP/PS1 female=3 | Sex: F(1,30)=1.104, *p=*0.3017; Genotype: F(1,30)=0.1863, *p=*0.6691; Interaction: F(1,30)=0.01715, *p=*0.8967 | | 3B (c-Fos, Male) | WT=3; APP/PS1=3 | B, NOR, PI+NOR: F(2,66)=34.08, *p<*0.0001; Genotype: F(1,66)=15.50, *p=*0.0002; Interaction: F(2,66)=10.53, *p=*0.0001 | | 3C (c-Fos, Female) | WT female=3; APP/PS1 female=3 | B, NOR, PI+NOR: F(2,61)=3.801, *p=*0.0278; Genotype: F(1,61)=0.1818, *p=*0.6713; Interaction: F(2,61)=10.52, *p=*0.0001 | | 3E (NET, Male) | WT=3; APP/PS1=3 | B, NOR, PI+NOR: F(2,12)=19.31, *p=*0.0002; Genotype: F(1,12)=9.721, *p=*0.0089; Interaction: F(2,12)=16.47, *p=*0.0004 | | 3F (NET, Female) | WT female=3; APP/PS1 female=3 | B, NOR, PI+NOR: F(2,12)=50.86, *p<*0.0001; Genotype: F(1,12)=2.706, *p=*0.1259; Interaction: F(2,12)=0.7886, *p=*0.4767 | | Supp. 1B (UPLC, NE) | WT male=5; APP/PS1 male=5; WT female=5; APP/PS1 female=5 | Sex: F(1,16)=4.543, *p=*0.0489; Genotype: F(1,16)=3.915, *p=*0.0653; Interaction: F(1,16)=2.090, *p=*0.1676 | |
| --- | --- | --- | --- | --- | --- | --- | --- | --- | --- | --- | --- | --- | --- | --- | --- | --- | --- | --- | --- | --- | --- | --- | --- | --- | --- | --- | --- | --- | --- | --- | --- | --- | --- | --- | --- | --- | --- | --- | --- | --- | --- | --- | --- | --- | --- | --- | --- | --- | --- | --- | --- | --- | --- | --- | --- | --- | --- | --- | --- | --- | --- | --- | --- | --- | --- | --- | --- | --- | --- | --- | --- | --- | --- | --- | --- |

Note: All datasets were analysed using two-way ANOVA followed by Tukey-Kramer’s multiple comparison test and represented as mean ± SEM

Abbreviations: B, baseline; dH, dorsal hippocampus; dDG, dorsal dentate gyrus; dCA1, dorsal CA1; dCA3, dorsal CA3; dMoDG, dorsal molecular layer of dentate gyrus; dPoDG, dorsal polymorphic layer of dentate gyrus; NE, norepinephrine; NET, norepinephrine transporter; NOR, novel object recognition; PI, proactive interference; SL, stratum lucidum; SLM, stratum lacunosum moleculare; SO, stratum oriens; SR, stratum radiatum; s, seconds; UPLC, ultra-high performance liquid chromatography; WT, wild-type
